# Supplementary material
Source: PubMed Central journal article supplement (PMC2718287)
Supplement: emboj2009165s2.pdf [file emboj2009165s2.pdf]

Manuscript EMBO-2009-70339

**Structure and function of a complex between chorismate mutase and DAHP synthase: efficiency boost for the junior partner**

Severin Sasso, Mats Okvist, Kathrin Roderer, Marianne Gamper, Giosiana Codoni, Ute Krengel

*Corresponding author: Peter Kast, ETH Zurich*

---

**Review timeline:**

Submission date:

09 January 2009

Accepted:

26 May 2009

---

No Review Process File is available with this article, as the authors have chosen not to make the review process public in this case.
